# Supplementary material for: Atypical breathing driven two-dimensional valley multiferroicity
Source: Royal Society of Chemistry journal article supplement (doi:10.1039/d4mh01087f), 2024-01-01
Supplement: d4mh01087f1.pdf [file d4mh01087f1.pdf]

**Supplementary Information for**  
**Atypical Breathing Driven Two-Dimensional Valley Multiferroicity**

Yangyang Feng, Jiangyu Zhao, Ying Dai,\* Baibiao Huang, Yandong Ma\*

School of Physics, State Key Laboratory of Crystal Materials, Shandong University, Shandan  
Street 27, Jinan 250100, China

\*Corresponding author: daiy60@sdu.edu.cn (Y.D.); yandong.ma@sdu.edu.cn (Y.M.)

## Tight-binding model

To describe the valley physics of the lattice, we construct an effective tight-binding model for characterizing the low-energy band dispersions around the Fermi level.

$$H = -t \sum_{\langle i,j \rangle} c_i^\dagger c_j + i\lambda_{SOC} \sum_{\langle\langle i,j \rangle\rangle} v_{ij} c_i^\dagger s_z c_j + m \sum_i \sigma_z c_i^\dagger s_z c_i + U \sum_i \delta c_i^\dagger c_i + h.c. \quad (1)$$

Here,  $c_i^\dagger$  ( $c_i$ ) is the creation (annihilation) operator of an electron on site  $i$ . The first term represents nearest-neighbor (NN) hopping with transfer energy  $t$ , and could also be considered as inter-sublattice interaction. The second term indicates the next-nearest-neighbor (NNN) SOC with  $\lambda_{SOC}$  denoting the strengths.  $v_{ij} = \pm 1$  corresponds to the counterclockwise/clockwise hopping. The third term describes antiferromagnetic exchange interaction with spontaneous magnetic moment:  $m = \langle n_{i,\uparrow} - n_{i,\downarrow} \rangle$ .  $U$  represents the effect of out-of-plane electric polarization.  $\delta = \pm 1$  corresponds to the A- and B-sublattices.  $\sigma_z$  and  $s_z$  are the Pauli matrices for the isospin and spin degrees of freedom, respectively.

According to **Fig. 2(a)**, the NN and NNN basis vectors are respectively written as

$$a_1 = (0, 1) \quad a_2 = \left(-\frac{\sqrt{3}}{2}, -\frac{1}{2}\right) \quad a_3 = \left(\frac{\sqrt{3}}{2}, -\frac{1}{2}\right) \quad (2)$$

$$b_1 = (\sqrt{3}, 0) \quad b_2 = \left(-\frac{\sqrt{3}}{2}, \frac{3}{2}\right) \quad b_3 = \left(-\frac{\sqrt{3}}{2}, -\frac{3}{2}\right) \quad (3)$$

After Fourier transformation, the Eq. (1) is transferred into momentum space, and the four terms can be given as

$$\begin{pmatrix} 0 & -t(e^{-ik \cdot a_1} + e^{-ik \cdot a_2} + e^{-ik \cdot a_3}) \\ -t(e^{ik \cdot a_1} + e^{ik \cdot a_2} + e^{ik \cdot a_3}) & 0 \end{pmatrix} \otimes \sigma_0 \otimes s_0 \quad (4)$$

$$\begin{pmatrix} [i\lambda_{SOC} v_A (e^{-ik \cdot b_1} + e^{-ik \cdot b_2} + e^{-ik \cdot b_3}) + h.c.] \otimes s_z & 0 \otimes s_0 \\ 0 \otimes s_0 & [i\lambda_{SOC} v_B (e^{-ik \cdot b_1} + e^{-ik \cdot b_2} + e^{-ik \cdot b_3}) + h.c.] \otimes s_z \end{pmatrix} \otimes \sigma_0 \quad (5)$$

$$\begin{pmatrix} m & 0 \\ 0 & m \end{pmatrix} \otimes \sigma_z \otimes s_z \quad (6)$$

$$\begin{pmatrix} U & 0 \\ 0 & -U \end{pmatrix} \otimes \sigma_0 \otimes s_0 \quad (7)$$

Considering the Néel-type AFM coupling of the system, we employ a simplified four-band model by focusing on a single spin channel within each sublattice (spin-down channel of A-sublattice and spin-up channel of B-sublattice). In this case, the low-energy effective Hamiltonian can be expressed as

$$H = \begin{pmatrix} -2\lambda_{\text{SOC}}\nu_A\gamma(k)\sigma_0 + m\sigma_z + U\sigma_0 & -tf(k)\sigma_0 \\ -tf^*(k)\sigma_0 & 2\lambda_{\text{SOC}}\nu_B\gamma(k)\sigma_0 - m\sigma_z - U\sigma_0 \end{pmatrix} \quad (8)$$

Here,  $\gamma(k) = \sin(\sqrt{3}k_y) - 2\cos(\frac{3}{2}k_x)\sin(\frac{\sqrt{3}}{2}k_y)$  and  $f(k) = e^{-ik_x} + 2e^{\frac{ik_y}{2}}\cos(\frac{\sqrt{3}}{2}k_y)$ . Due to the atypical lattice breathing during the ferroelectric transition as defined in main text, the  $\nu_A$  and  $\nu_B$  related to phase of NNN hopping have same or different values under state-I, state-II and state-PE. The details of the specific values are listed in **Table S1**.

**Table S1.** The tight-binding model parameters  $v_A$  and  $v_B$  under state-I, state-II and state-PE.

|          | $v_A$ | $v_B$ |
|----------|-------|-------|
| State-I  | +1    | +1    |
| State-PE | -1    | +1    |
| State-II | -1    | -1    |

**Table S2.** The tight-binding model parameters for the band dispersions and Berry curvature near the Fermi level. All the parameters are in units of eV.

| $t$ | $\lambda_{\text{soc}}$ | $m$ | $U$ |
|-----|------------------------|-----|-----|
| 0.4 | 0.01                   | 0.5 | 0.2 |

**Table S3.** Lattice constants ( $a$ ,  $b$ ) and axial angle ( $\alpha$ ,  $\beta$ ,  $\gamma$ ) under state-I, state-AFE, state-PE, and state-II for SL  $\text{Gd}_2\text{CO}_2$ .

|            | $a$ (Å) | $b$ (Å) | $\alpha$ (°) | $\beta$ (°) | $\gamma$ (°) |
|------------|---------|---------|--------------|-------------|--------------|
| State-I/II | 3.796   | 3.796   | 90.0         | 90.0        | 120.0        |
| State-AFE  | 7.465   | 7.433   | 90.1         | 90.9        | 119.9        |
| State-PE   | 3.721   | 3.721   | 90.0         | 90.0        | 120.0        |

**Table S4.** The energy difference of four possible magnetic orders: ferromagnetic (FM), stripy-type antiferromagnetic (sAFM), Néel-type antiferromagnetic (nAFM), and zigzag-type antiferromagnetic (zAFM).

|                  | FM | sAFM  | nAFM  | zAFM   |
|------------------|----|-------|-------|--------|
| $\Delta E$ (meV) | 0  | -5.67 | -4.99 | -11.04 |

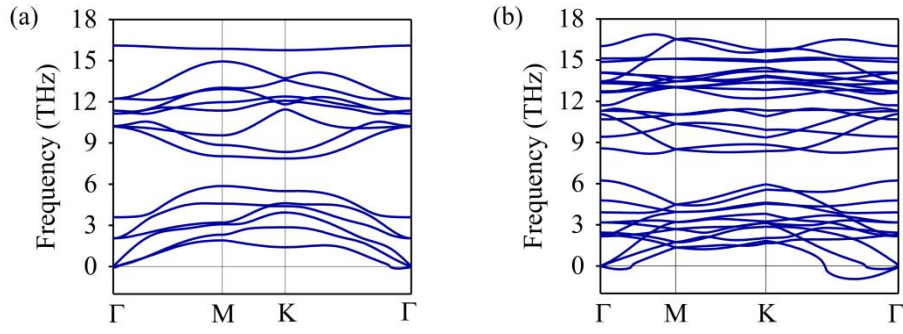

**Fig. S1** Phonon spectra for (a) SL  $\text{Gd}_2\text{CO}_2$  and (b) strained  $\text{Gd}_2\text{CO}_2$ .

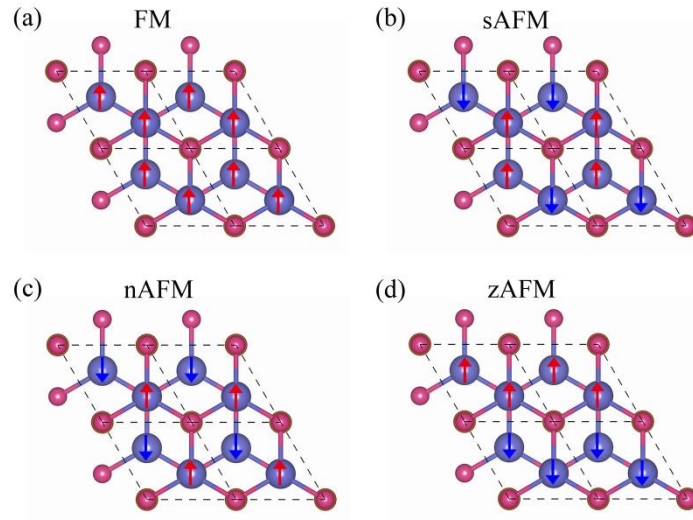

**Fig. S2** Schematic diagrams of four possible magnetic orders: (a) FM, (b) sAFM, (c) nAFM, and (d) zAFM.

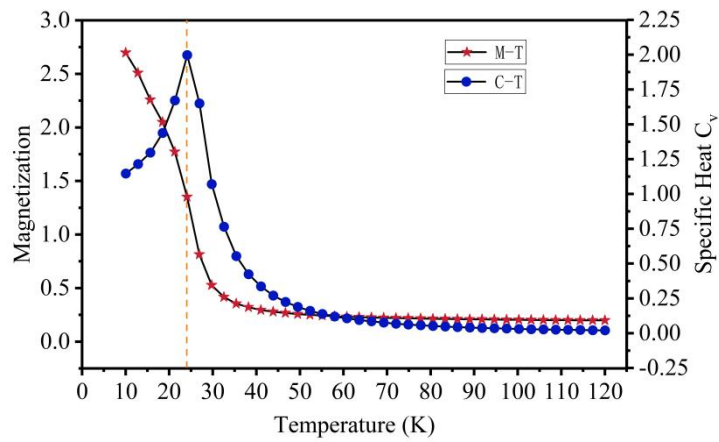

**Fig. S3** Magnetization and specific heat  $C_V$  as a function of temperature for SL  $\text{Gd}_2\text{CO}_2$ .

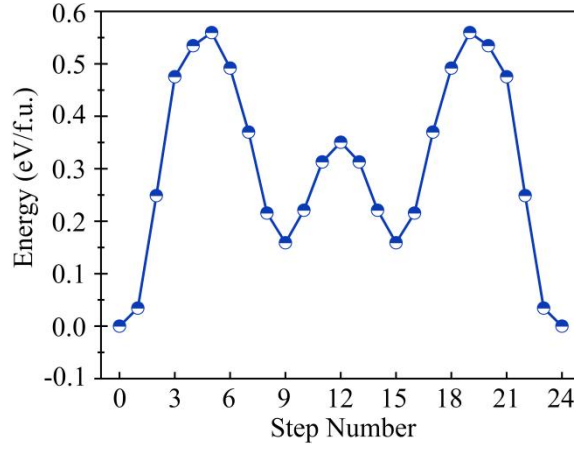

**Fig. S4** Energy barriers for FE transition of -8.2% strained  $\text{Gd}_2\text{CO}_2$ .

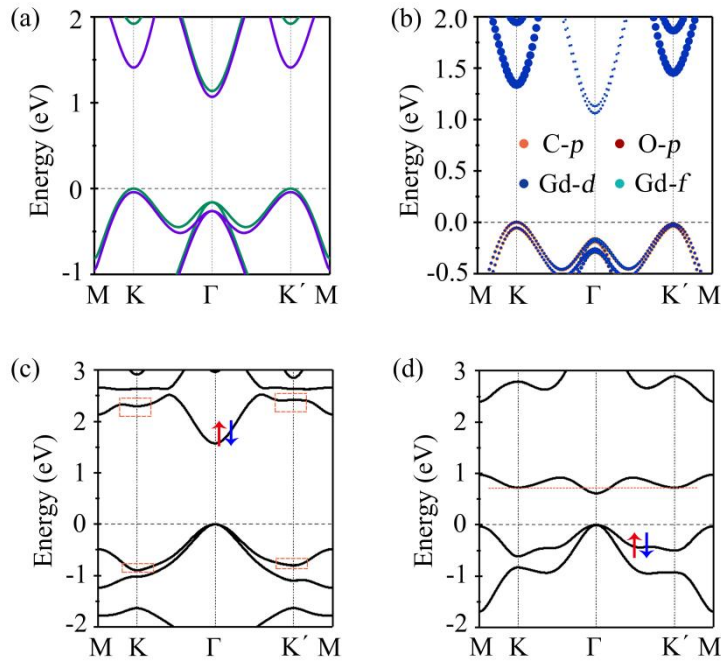

**Fig. S5** (a) Band structures of SL  $\text{Gd}_2\text{CO}_2$  without SOC. Purple and green lines represent spin-up and spin-down channels, respectively. (b) Orbital-resolved band structures of SL  $\text{Gd}_2\text{CO}_2$  with SOC. Band structures of SL  $\text{Gd}_2\text{CO}_2$  under state-PE (c) without and (d) with strain. The Fermi level is set to 0 eV.

**Fig. S1(b)** shows the phonon spectra of the strained  $\text{Gd}_2\text{CO}_2$ , from which we can see slight imaginary frequencies around the  $\Gamma$  point, indicating its stability. For -8.2% strained  $\text{Gd}_2\text{CO}_2$  with nAFM ground state, the local magnetic moments on  $\text{Gd}_A$  and  $\text{Gd}_B$  under state-I (state-II) state are obtained to be -7.039 (-7.062) and 7.062 (7.039)  $\mu_B$ , implying nonequivalent sublattices and the existence of a net magnetic moment. The net magnetic moment under state-I (state-II) is 0.038 (-

0.038)  $\mu_B$  per unit cell. The calculated electric polarization is 12.76 (-12.76) pC/m for state-I (state-II), respectively. The FE switching barrier is 0.57 eV/f.u. (**Fig. S4**), which is only slightly larger than that of unstressed one, suggesting the feasibility of FE switching. The corresponding band structures with SOC are shown in **Fig. S6(a,b,c,d)**. Clearly, there is a pairs of valleys located at the K and K' points in the bottom conduction band, and the valley polarization of 66.3 meV occurs spontaneously. As shown in **Fig. S6(a,c)**, the valley of state-I in the conduction band is mainly from the spin-down channel of Gd<sub>A</sub>. When transforming into state-II through the atypical breathing of the trigons, the valley of state-II in the conduction band is contributed by the spin-up channel of Gd<sub>B</sub> [**Fig. S6(b,d)**]. The calculated Berry curvatures are shown in **Fig. S6(e)**. For state-I (state-II), the Berry curvature at the K valley has a significantly large negative (positive) value. Due to the large Berry curvature, the Bloch carriers at the valleys will acquire an anomalous transverse velocity in the presence of an in-plane electric field and transversely move to one boundary of the system. For example, as illustrated in **Fig. S6(f)**, for state-I (state-II), by shifting the Fermi level between K and K' valleys in the bottom conduction band, the spin-down (spin-up) electrons in the K valley would accumulate at the right (left) boundary of the sample. Obviously, this gives rise to the ferroelectrically reversible AVH effect, which is driven by the atypical breathing of the trigons.

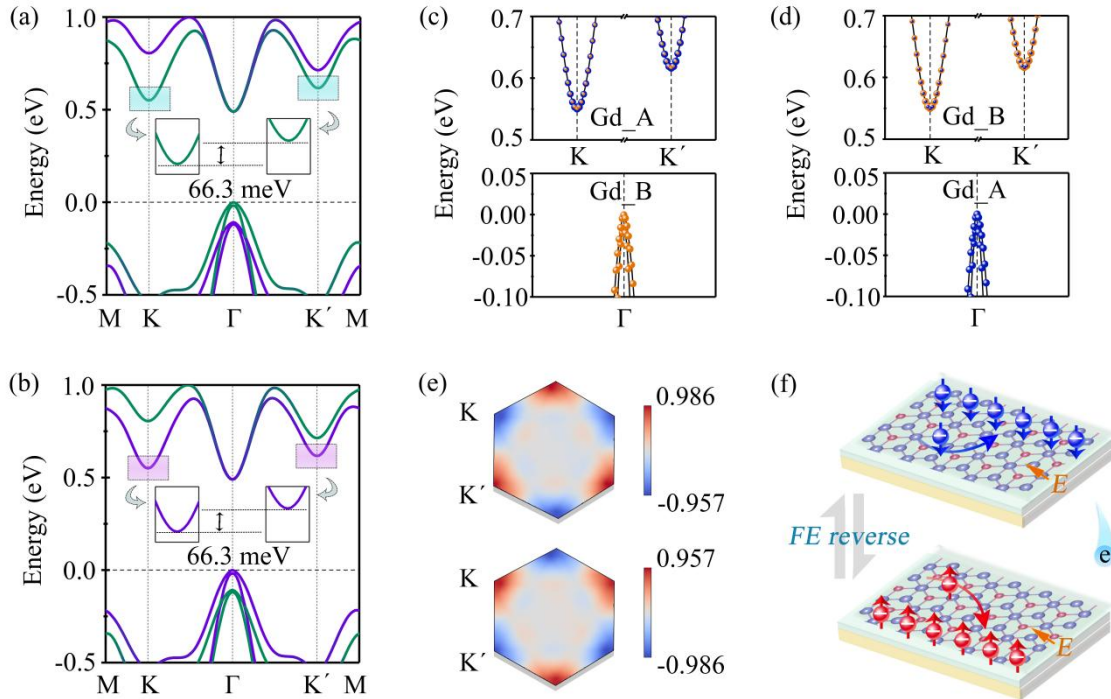

**Fig. S6** Spin-resolved band structures of -8.2% strained Gd<sub>2</sub>CO<sub>2</sub> under (a) state-I and (b) state-II.

Purple and green lines represent spin-up and spin-down channels, respectively. The Fermi level is set to 0 eV. Sublattice-resolved band structures of (c) state-I and (d) state-II. (e) Berry curvatures for state-I (up panel) and state-II (low panel). (f) Illustrations of ferroelectrically reversible AVH effect.
